# Supplementary material for: Hepatic Diacylglycerol-Associated Protein Kinase Cε Translocation Links Hepatic Steatosis to Hepatic Insulin Resistance in Humans
Source: PubMed Central journal article supplement — Cell Rep. 2017 Jun 6;19(10):1997–2004. doi: 10.1016/j.celrep.2017.05.035 (PMC5469939; doi:10.1016/j.celrep.2017.05.035), 2017-06-06
Supplement: mmc1.pdf [file mmc1.pdf]

**Supplemental Information**

**Hepatic Diacylglycerol-Associated Protein**

**Kinase C $\epsilon$  Translocation Links Hepatic**

**Steatosis to Hepatic Insulin Resistance in Humans**

**Kasper W. ter Horst, Pim W. Gilijamse, Ruth I. Versteeg, Mariette T. Ackermans, Aart J. Nederveen, Susanne E. la Fleur, Johannes A. Romijn, Max Nieuwdorp, Dongyan Zhang, Varman T. Samuel, Daniel F. Vatner, Kitt F. Petersen, Gerald I. Shulman, and Mireille J. Serlie**

**Table S1. Hormones and Metabolites during Hyperinsulinemic-Euglycemic Clamp Studies. Related to Figures 1 and 2.**

|                                     | No steatosis<br>(n = 52) | Mild steatosis<br>(n = 41) | Severe steatosis<br>(n = 40) | p <sup>a</sup> |
|-------------------------------------|--------------------------|----------------------------|------------------------------|----------------|
| Basal (fasting)                     |                          |                            |                              |                |
| Insulin (pmol/l)                    | 84 ± 5                   | 131 ± 9**                  | 145 ± 16***                  | < 0.001        |
| Glucagon (ng/l)                     | 94 ± 5                   | 98 ± 6                     | 81 ± 5                       | 0.129          |
| Cortisol (nmol/l)                   | 228 ± 13                 | 214 ± 14                   | 213 ± 22                     | 0.754          |
| FA (mmol/l)                         | 0.66 ± 0.03              | 0.65 ± 0.03                | 0.63 ± 0.03                  | 0.702          |
| Low-dose insulin infusion (step 1)  |                          |                            |                              |                |
| Insulin (pmol/l)                    | 301 ± 13                 | 343 ± 18                   | 326 ± 24                     | 0.249          |
| Glucagon (ng/l)                     | 78 ± 4                   | 80 ± 5                     | 76 ± 4                       | 0.858          |
| Cortisol (nmol/l)                   | 271 ± 16                 | 252 ± 20                   | 259 ± 15                     | 0.562          |
| FA (mmol/l)                         | 0.11 ± 0.01              | 0.16 ± 0.01*               | 0.17 ± 0.01**                | 0.004          |
| High-dose insulin infusion (step 2) |                          |                            |                              |                |
| Insulin (pmol/l)                    | 765 ± 30                 | 811 ± 47                   | 777 ± 35                     | 0.664          |
| Glucagon (ng/l)                     | 67 ± 4                   | 70 ± 6                     | 65 ± 4                       | 0.778          |
| Cortisol (nmol/l)                   | 226 ± 16                 | 218 ± 20                   | 213 ± 15                     | 0.842          |
| FA (mmol/l)                         | 0.03 ± 0.00              | 0.04 ± 0.00                | 0.05 ± 0.00*                 | 0.009          |

Data are mean ± SEM. No, mild and severe hepatic steatosis were defined as IHTG < 5.56%, 5.56 – 15%, or > 15%, respectively. Fatty acids (FA), intrahepatic triglycerides (IHTG).

<sup>a</sup> Groups were compared by 1-way ANOVA with Bonferroni correction for multiple testing.

\* p < 0.05 vs no steatosis. \*\* p < 0.01 vs no steatosis. \*\*\* p < 0.001 vs no steatosis.

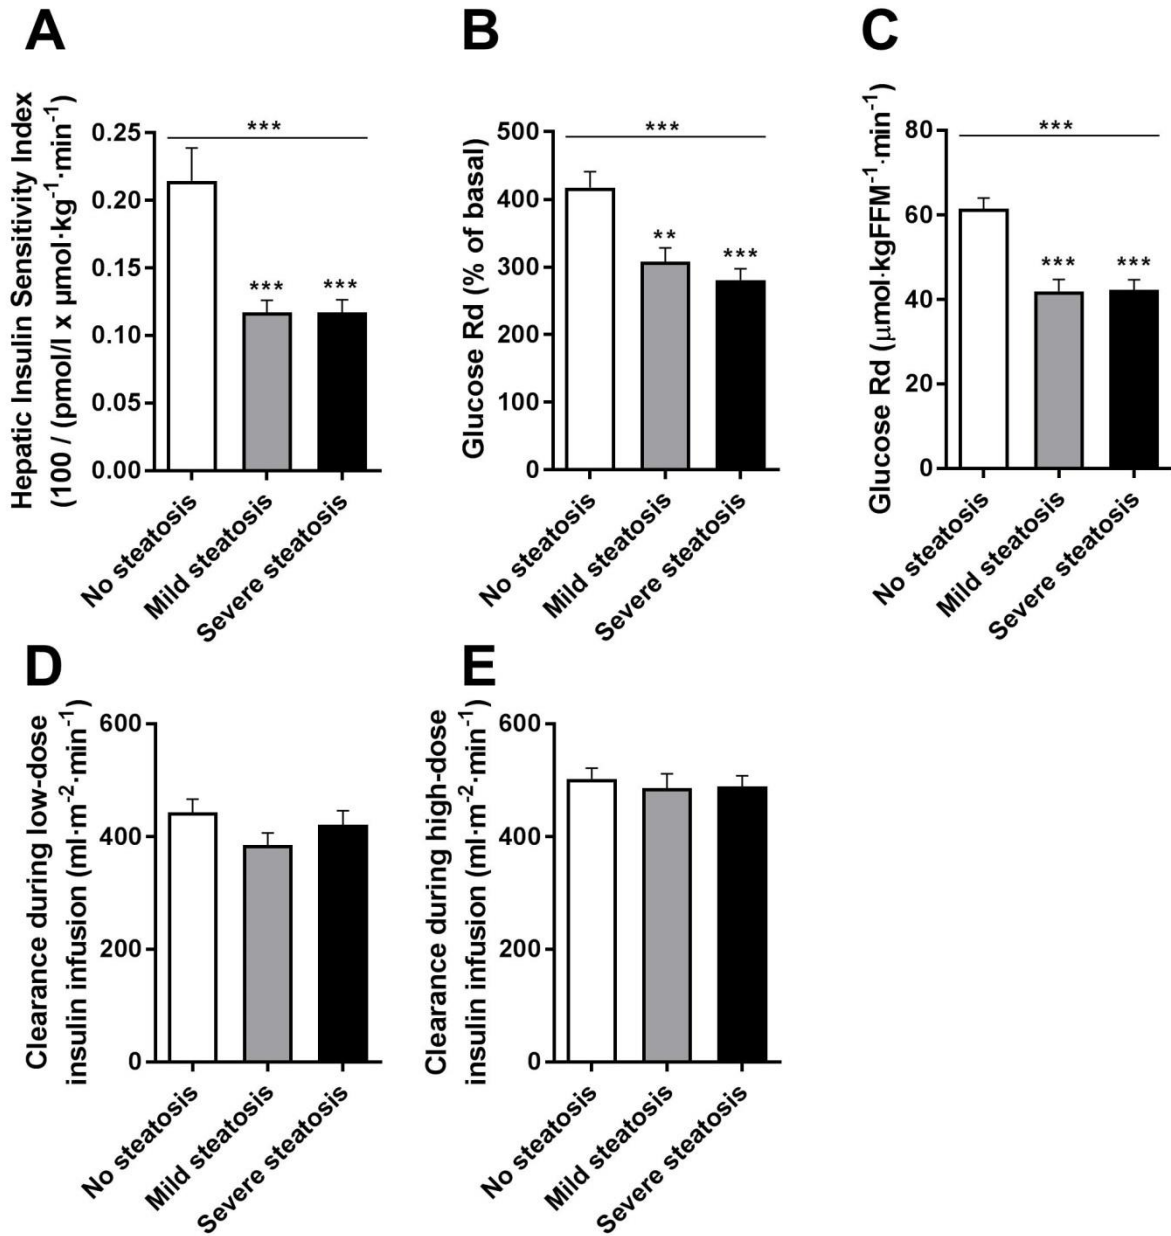

**Figure S1. Additional Metabolic Flux Data. Related to Figure 1.**

(A) The Hepatic Insulin Sensitivity Index was reduced in subjects with hepatic steatosis, but did not differ between subjects with mild or severe steatosis. The index was calculated as  $100 / (\text{fasting plasma insulin} \times \text{basal endogenous glucose production})$ .

(B) Expressing peripheral insulin sensitivity as percentage increase relative to basal glucose uptake yielded similar results.

(C) Expressing peripheral insulin sensitivity relative to lean body mass yielded similar results.

(D) Insulin clearance during low-dose insulin infusion (step 1 of the clamp) did not differ between subjects with varying extent of steatosis. Insulin clearance was calculated as insulin infusion rate / plasma insulin concentration during the clamp.

(E) Insulin clearance during high-dose insulin infusion (step 2) did not differ between subjects with varying extent of steatosis.

Data are mean  $\pm$  SEM (n = 133). Rate of disappearance (Rd), fat-free mass (FFM).

\*\* p < 0.01 vs no steatosis. \*\*\* p < 0.001 vs no steatosis.

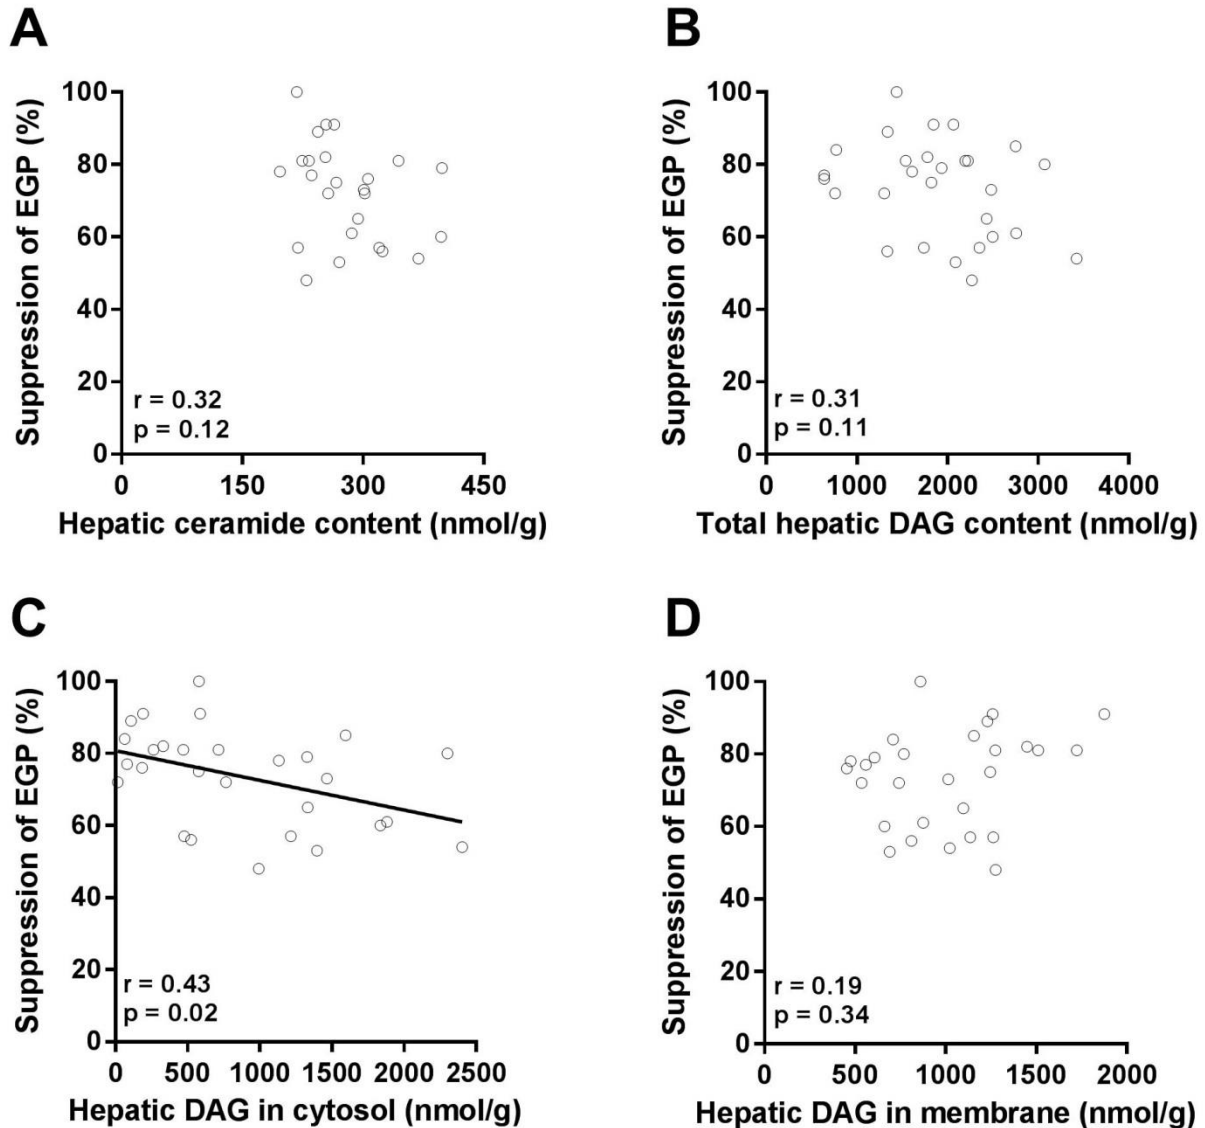

**Figure S2. Hepatic DAG Accumulation in the Cytosolic Fraction, but Not Total DAG Content, Membrane DAG Content, or Ceramide Content, Predicted Hepatic Insulin Sensitivity in Obese Subjects. Related to Figure 3.**

- (A) Hepatic ceramide content and insulin suppression of EGP.
- (B) Total hepatic DAG content and insulin suppression of EGP.
- (C) Hepatic DAG content in the cytosolic fraction and insulin suppression of EGP.
- (D) Hepatic DAG content in the membrane fraction and insulin suppression of EGP.

Lines were fitted by least squares method ( $n = 25-29$ ). Diacylglycerol (DAG), endogenous glucose production (EGP).

**Table S2. Correlations Between Individual Hepatic DAG Species and Insulin Sensitivity of EGP Suppression (n = 29). Related to Figure 3.**

| Species     | Cytosolic fraction |              |                                    | Membrane fraction |              |                                    |
|-------------|--------------------|--------------|------------------------------------|-------------------|--------------|------------------------------------|
|             | r <sup>a</sup>     | p            | Abundance<br>[mean ± SEM (nmol/g)] | r <sup>a</sup>    | p            | Abundance<br>[mean ± SEM (nmol/g)] |
| C18:1-C16:0 | <b>-0.44</b>       | <b>0.019</b> | <b>222.6 ± 33.9</b>                | 0.01              | 0.948        | 215.2 ± 14.6                       |
| C20:4-C20:5 | -0.12              | 0.551        | 17.1 ± 2.3                         | <b>0.41</b>       | <b>0.028</b> | <b>84.7 ± 6.9</b>                  |
| C16:0-C20:4 | -0.36              | 0.061        | 0.7 ± 0.1                          | 0.39              | 0.041        | 1.6 ± 0.1                          |
| C18:0-C20:4 | -0.27              | 0.172        | 0.6 ± 0.1                          | 0.41              | 0.032        | 2.0 ± 0.1                          |
| C18:0-C18:0 | -0.47              | 0.012        | 15.2 ± 2.1                         | -0.12             | 0.559        | 15.3 ± 0.9                         |
| C18:2-C18:0 | -0.33              | 0.083        | 7.9 ± 1.2                          | 0.34              | 0.078        | 12.9 ± 0.8                         |
| C18:1-C18:0 | -0.42              | 0.027        | 27.6 ± 4.2                         | 0.06              | 0.760        | 32.8 ± 2.4                         |
| C16:0-C16:0 | <b>-0.47</b>       | <b>0.013</b> | <b>73.5 ± 12.0</b>                 | -0.21             | 0.296        | 71.0 ± 4.5                         |
| C18:0-C16:0 | -0.45              | 0.015        | 23.5 ± 3.5                         | -0.10             | 0.630        | 20.6 ± 1.3                         |
| C18:1-C18:1 | <b>-0.41</b>       | <b>0.030</b> | <b>326.4 ± 51.2</b>                | 0.17              | 0.377        | 377.4 ± 34.2                       |
| C18:1-C18:2 | -0.33              | 0.091        | 59.6 ± 9.5                         | 0.34              | 0.076        | 65.8 ± 6.8                         |
| C18:2-C18:2 | -0.23              | 0.233        | 9.8 ± 1.6                          | 0.38              | 0.044        | 10.4 ± 1.1                         |
| C16:0-C18:2 | -0.33              | 0.085        | 79.0 ± 12.4                        | 0.29              | 0.130        | 100.9 ± 5.9                        |

Highly abundant species that were also related to hepatic insulin sensitivity are highlighted. Diacylglycerol (DAG), endogenous glucose production (EGP).

<sup>a</sup> Correlations were evaluated by Pearson's correlation coefficient.

**Table S3. Correlations Between Individual Hepatic Ceramide Species and Insulin Sensitivity of EGP Suppression (n = 25). Related to Figure 3.**

| Species | r <sup>a</sup> | p     | Abundance<br>[mean ± SEM (nmol/g)] |
|---------|----------------|-------|------------------------------------|
| C16:0   | -0.27          | 0.187 | 58.8 ± 2.1                         |
| C18:0   | -0.24          | 0.254 | 16.6 ± 0.6                         |
| C20:0   | -0.28          | 0.180 | 43.8 ± 6.6                         |
| C22:0   | -0.27          | 0.190 | 65.1 ± 2.4                         |
| C24:1   | -0.16          | 0.447 | 40.9 ± 1.2                         |
| C24:0   | -0.06          | 0.779 | 52.4 ± 2.1                         |

Endogenous glucose production (EGP).

<sup>a</sup> Correlations were evaluated by Pearson's correlation coefficient.

**Table S4. Characteristics of Subjects with Normal Hepatic Insulin Sensitivity or with Hepatic Insulin Resistance, Who Had Liver Biopsies Taken during Bariatric Surgery. Related to Figure 3.**

|                                                       | Sensitive<br>(n = 10) | Resistant<br>(n = 8) | p <sup>a</sup> |
|-------------------------------------------------------|-----------------------|----------------------|----------------|
| Female sex                                            | 6 (60)                | 3 (38)               | 0.343          |
| Age (years)                                           | 51 ± 2                | 45 ± 4               | 0.135          |
| Body mass index (kg/m <sup>2</sup> )                  | 41 ± 1                | 47 ± 3               | 0.055          |
| Body fat content (%)                                  | 45 ± 1                | 47 ± 3               | 0.603          |
| Fasting glucose (mmol/l)                              | 4.8 ± 0.1             | 5.5 ± 0.3            | 0.013          |
| Fasting insulin (pmol/l)                              | 115 ± 20              | 183 ± 20             | 0.029          |
| Basal EGP (μmol·kg <sup>-1</sup> ·min <sup>-1</sup> ) | 6.9 ± 0.3             | 7.2 ± 0.3            | 0.518          |
| Insulin suppression of EGP (%)                        | 87 ± 2                | 56 ± 1               | < 0.001        |
| IHTG content (%)                                      | 9.2 ± 3.0             | 14.2 ± 2.6           | 0.209          |

Data are count (%) or mean ± SEM. Hepatic insulin sensitivity and resistance were defined as insulin suppression of EGP > 80% and < 65%, respectively. Endogenous glucose production (EGP), intrahepatic triglyceride (IHTG).

<sup>a</sup> Groups were compared by 2-tailed independent samples t test.



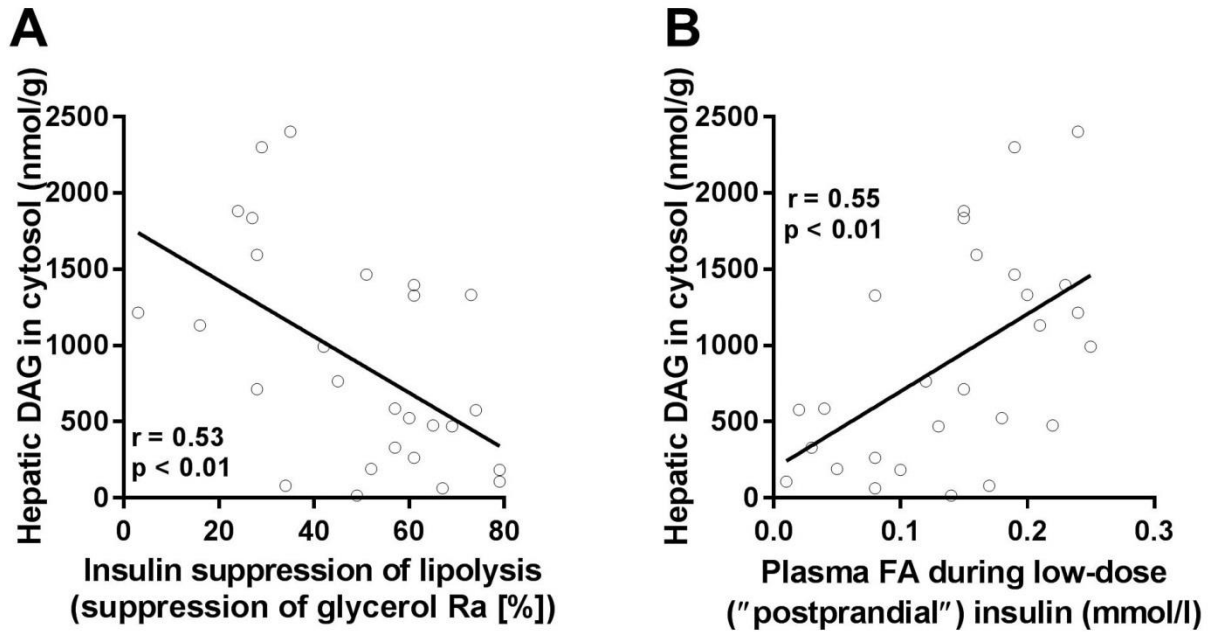

**Figure S3. Release of FA from Lipolysis during Hyperinsulinemic Conditions Predicts Hepatic DAG Accumulation. Related to Figure 3.**

(A) The rate of lipolysis during hyperinsulinemic-euglycemic clamps was assessed by tracer-dilution of [1,1,2,3,3-<sup>2</sup>H<sub>5</sub>]glycerol.

(B) Plasma FA concentrations during hyperinsulinemia.

Data were fitted by least squares method ( $n = 28$ ). Diacylglycerol (DAG), fatty acids (FA).
